# Supplementary material for: Enhanced Therapeutic Potential of Irreversible Electroporation under Combination with Gold-Doped Mesoporous Silica Nanoparticles against EMT-6 Breast Cancer Cells
Source: MDPI journal article supplement (doi:10.3390/bios13010041), 2022-12-27
Supplement: s1 [file s1]

# Enhanced Therapeutic Potential of Irreversible Electroporation under Combination with Gold-Doped Mesoporous Silica Nanoparticles Against EMT-6 Breast Cancer Cells

Yixin Jiang <sup>†</sup>, Ratchapol Jenjob <sup>†</sup>, Su-Geun Yang <sup>\*</sup>

Department of Biomedical Science, BK21 FOUR Program in Biomedical Science and Engineering, College of Medicine, Inha University, Incheon 22212, Republic of Korea

<sup>\*</sup> Correspondence: [sugeun.yang@inha.ac.kr](mailto:sugeun.yang@inha.ac.kr); Tel.: +82-32-890-2832; Fax: +82-32-890-1199

<sup>†</sup> These authors contributed equally to this work.

**Table S1.** Energy dispersive X-ray (EDX) spectroscopy measurement of 12% Au-MSNs.

| Element | Wt%    | Wt% Sigma | Atomic % |
|---------|--------|-----------|----------|
| O       | 29.77  | 0.34      | 46.39    |
| Si      | 58.76  | 0.34      | 52.16    |
| Au      | 11.48  | 0.26      | 1.45     |
| Total   | 100.00 |           | 100.00   |

**Table S2.** Energy dispersive X-ray (EDX) spectroscopy measurement of 5% Au-MSNs.

| Element | Wt%    | Wt% Sigma | Atomic % |
|---------|--------|-----------|----------|
| O       | 61.81  | 0.28      | 75.43    |
| Si      | 34.88  | 0.26      | 24.25    |
| Au      | 3.31   | 0.17      | 0.33     |
| Total   | 100.00 |           | 100.00   |

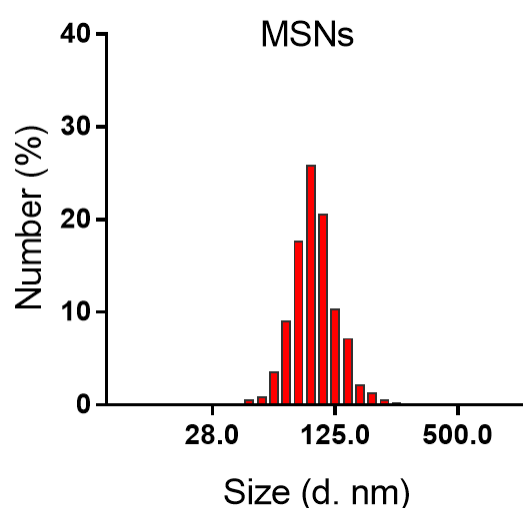

**Figure S1.** Particle size distribution of MSNs.
